# Supplementary material
Source: Springer Nature journal article supplement (https://www.springermedizin.de/resource/supplementary/12889_2010_3135_MOESM2_ESM.pdf/9488280)

SURVEY 2007

EXPOSURE CATEGORY

SURVEY  
2002

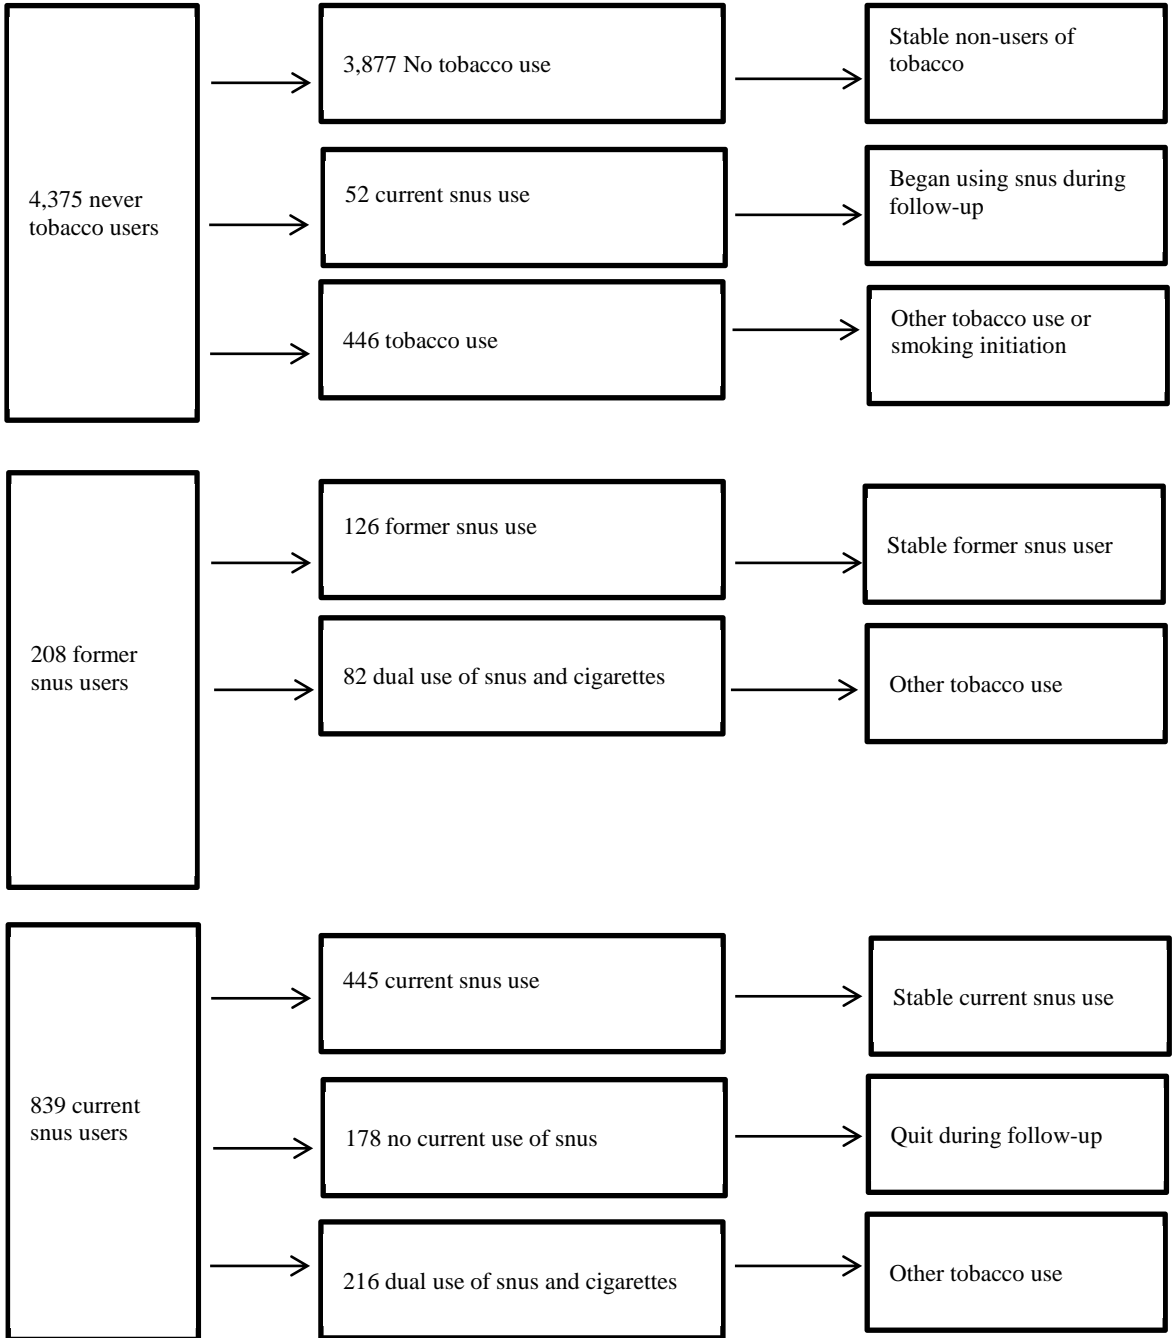

Supplement: MOESM2 [file 9488280]
